# Supplementary material for: pH-Responsive supramolecular hydrogels for codelivery of hydrophobic and hydrophilic anticancer drugs
Source: Royal Society of Chemistry journal article supplement (doi:10.1039/c4ra11311j), 2014-11-03
Supplement: c4ra11311j1.pdf [file c4ra11311j1.pdf]

## Supporting Information

### **pH-Responsive Supramolecular Hydrogels for Codelivery of Hydrophobic and Hydrophilic Anticancer Drugs**

Jing Yu<sup>a, b</sup>, Wei Ha<sup>a</sup>, Juan Chen<sup>a</sup>, Yan-ping Shi<sup>a\*</sup>

*<sup>a</sup> Key Laboratory of Chemistry of Northwestern Plant Resources and Key Laboratory for Natural Medicine of Gansu Province, Lanzhou Institute of Chemical Physics, Chinese Academy of Sciences, Lanzhou 730000, PR China*

*<sup>b</sup> University of Chinese Academy of Sciences, Beijing 100049, PR China*

---

\*Correspondence: Prof Yan-ping Shi, Lanzhou Institute of Chemical Physics, Chinese Academy of Sciences, Lanzhou 730000, P. R. China; E-mail: shiyp@licp.cas.cn; Fax: +86-931-4968094; Tel: +86-931-4968028

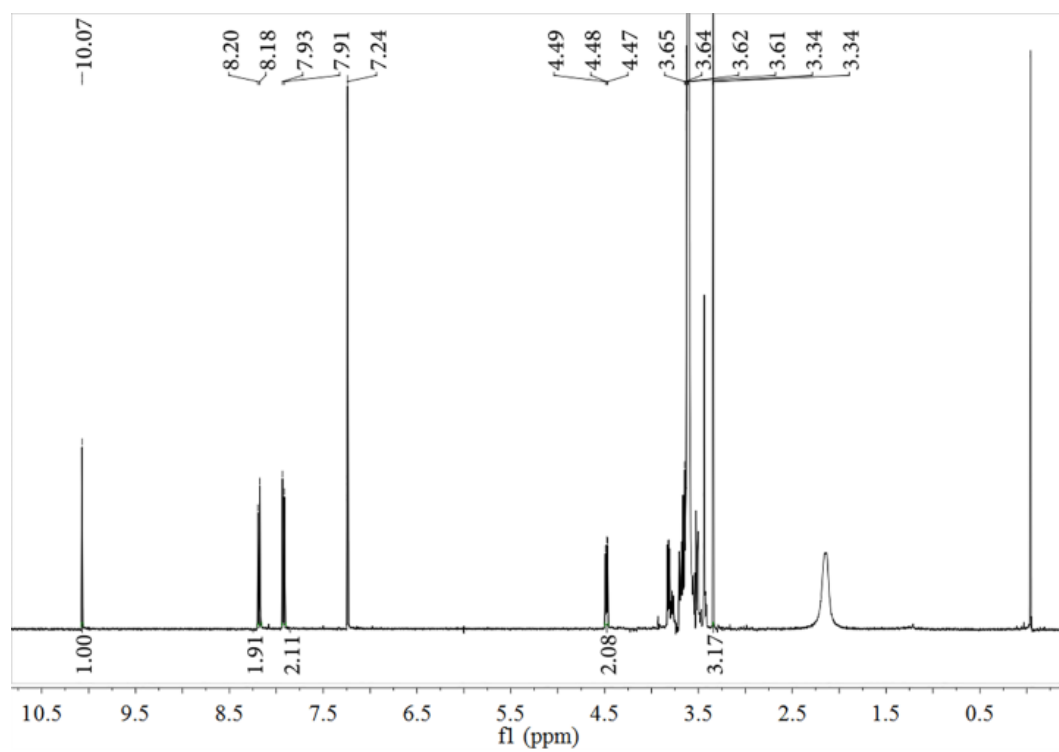

**Fig. S1** <sup>1</sup>H NMR (400MHz, CDCl<sub>3</sub>) spectrum of mPEG formyl benzoic acid ester.

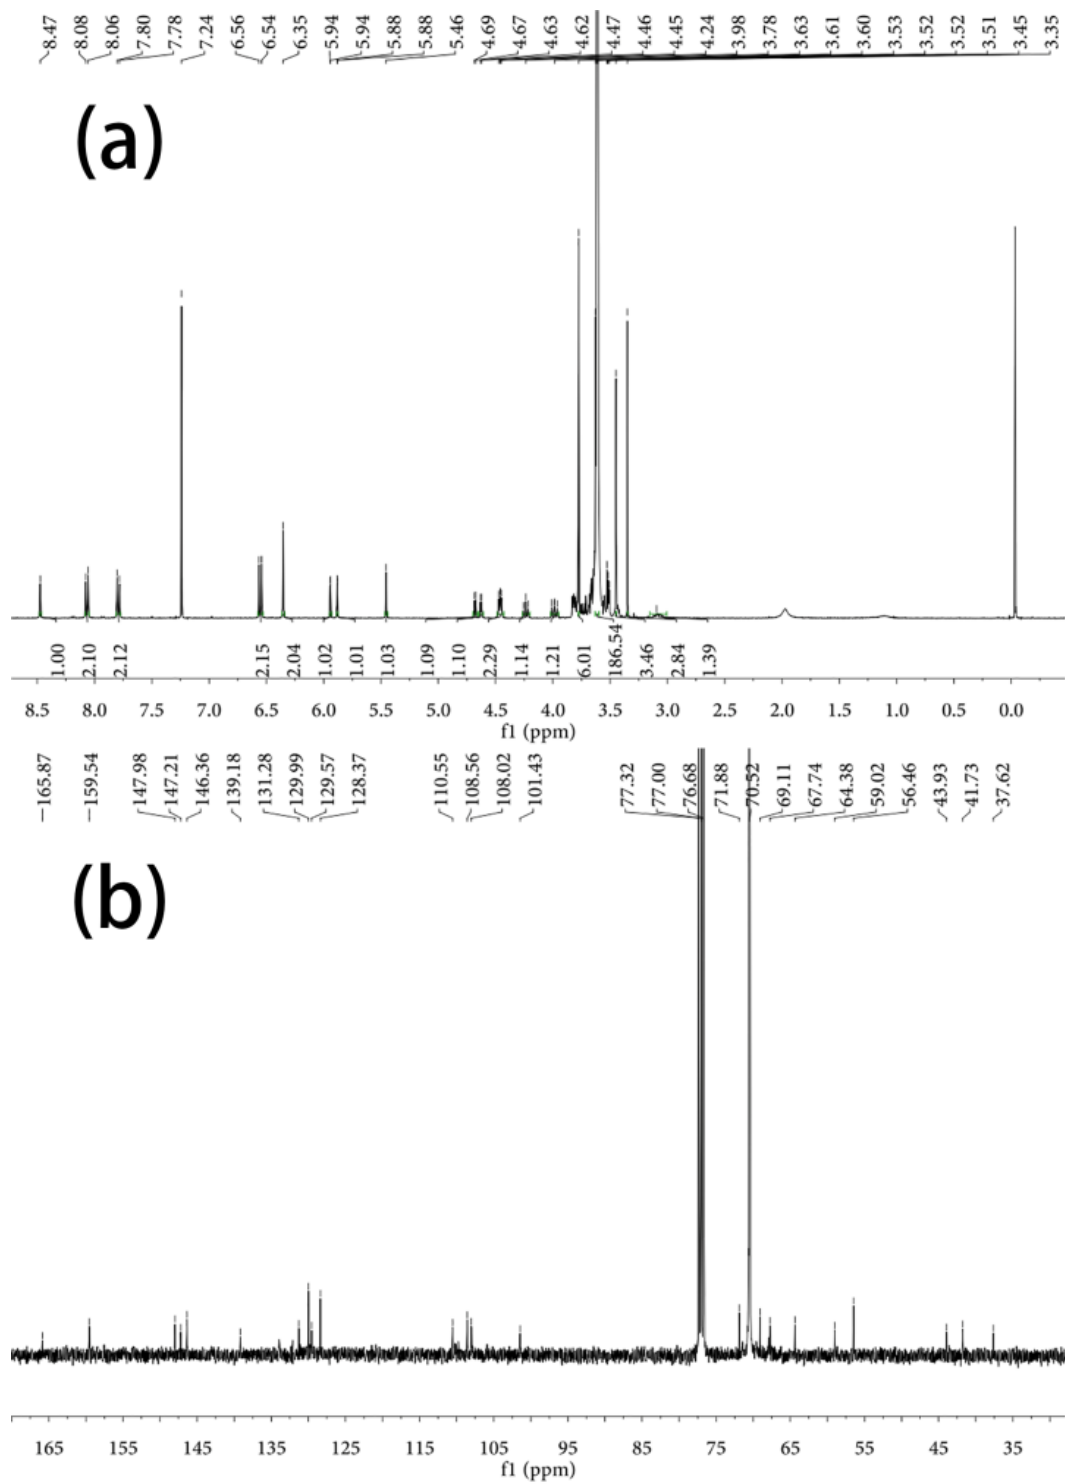

**Fig. S2**  $^1\text{H}$  NMR (a) (400MHz,  $\text{CDCl}_3$ ) and  $^{13}\text{C}$  NMR (b) (100MHz,  $\text{CDCl}_3$ ) spectrum of NPOD-PEG.

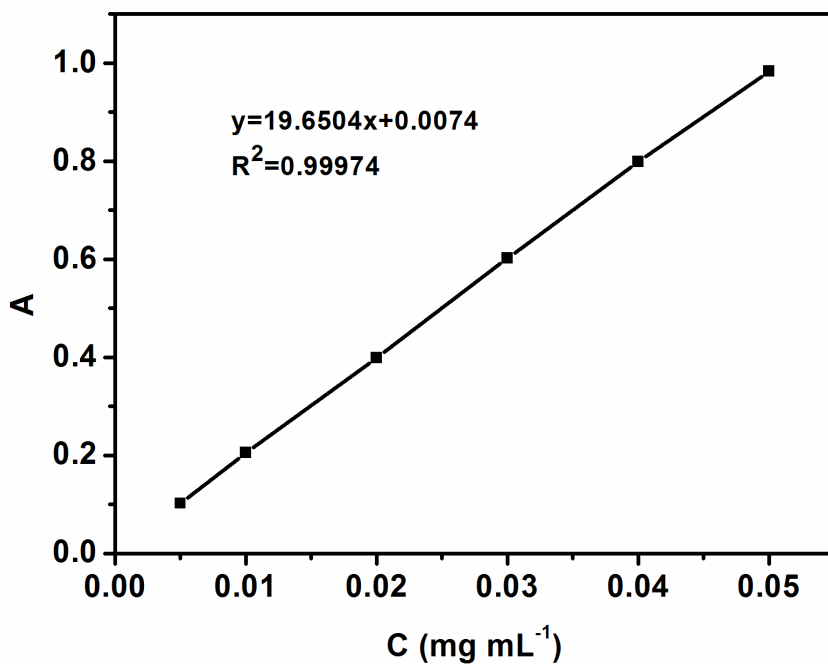

**Fig. S3** Calibration curve of DOX.

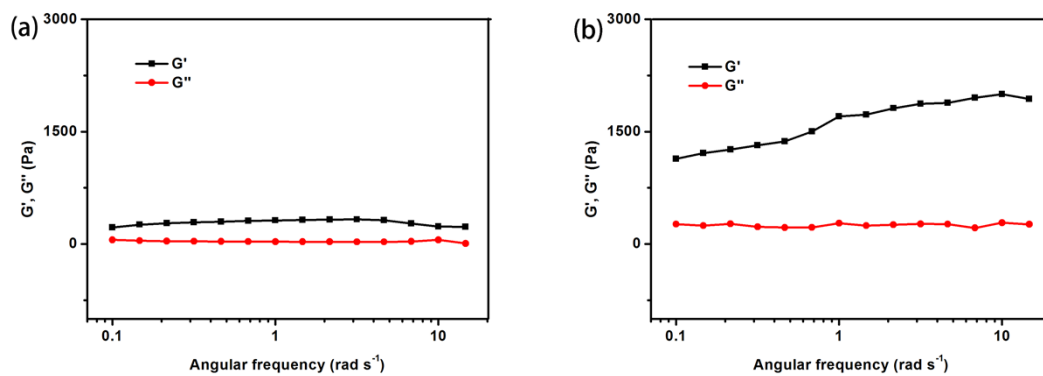

**Fig. S4** The dependence of the viscoelastic moduli on frequency for various NPOD-PEG/ $\alpha$ -CD hydrogel samples. (a) NPOD-PEG = 10 mg mL<sup>-1</sup>, b) NPOD-PEG = 30 mg mL<sup>-1</sup>.

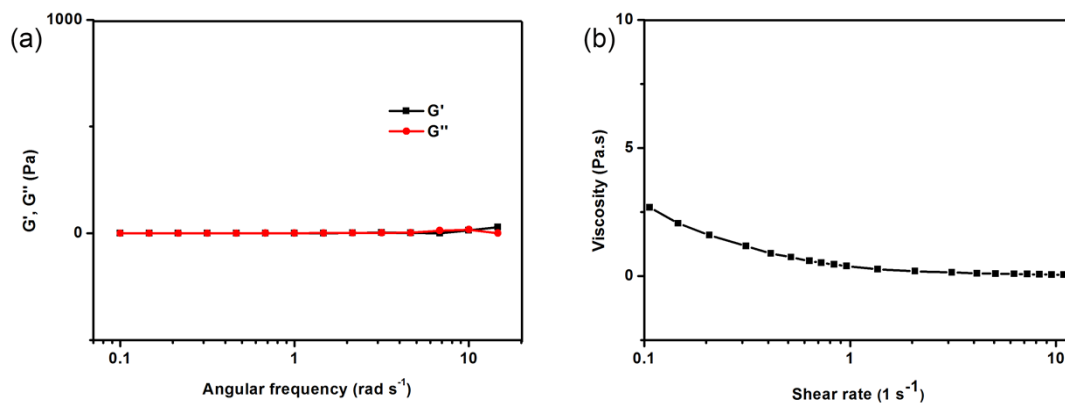

**Fig. S5** (a) Dynamic and (b) steady rheological behaviors of the diluted HCl-treated NPOD-PEG/ $\alpha$ -CD hydrogel.

**Table S1.** Dose-effect relationship parameters for NPOD and DOX in cancer model

| Cell | NPOD  |                 |     | DOX   |                 |     | (5:1) NPOD:DOX |                 |     |
|------|-------|-----------------|-----|-------|-----------------|-----|----------------|-----------------|-----|
|      | $D_m$ | Linear equation | r   | $D_m$ | Linear equation | r   | $D_m$          | Linear equation | r   |
| A54  | 4.29  | $y=2.3402x-$    | 0.9 | 4.4   | $y=1,4955x-$    | 0.9 | $3.72+0.7$     | $y=2.2122x-$    | 0.9 |
| 9    |       | 1.4818          | 9   | 8     | 0.9739          | 6   | 4              | 1.4370          | 9   |

Shape (sigmoidicity) and conformity of dose-effect curve (linear correlation coefficient) are represented by  $D_m$ , linear equation, r, respectively, where  $D_m$  is the antilog of x-intercept in  $\mu g mL^{-1}$ , r is the linear correlation coefficient of the median-effect plot.

**Table S2.** Interaction of NPOD and DOX combinations in cells at different stage of carcinogenesis: combination indices at different effect levels

| Cell | Combination index (CI) at: |         |         |         |         |         |         |         |         |
|------|----------------------------|---------|---------|---------|---------|---------|---------|---------|---------|
|      | $fa0.1$                    | $fa0.2$ | $fa0.3$ | $fa0.4$ | $fa0.5$ | $fa0.6$ | $fa0.7$ | $fa0.8$ | $fa0.9$ |
| A549 | 1.09                       | 1.06    | 1.05    | 1.04    | 1.03    | 1.03    | 1.02    | 1.02    | 1.02    |

CI value  $<1$ ,  $=1$ ,  $>1$  indicates synergism, additive effect, and antagonism, respectively.  $fa$  is the fraction effected.
